1 ***Aedes aegypti* Aag-2 culture cells enter endoreplication process**  
2 **upon pathogen challenge**

3 Christian Domínguez-Benítez<sup>1</sup>, Javier Serrato-Salas<sup>1</sup>, Renaud Condé, Humberto  
4 Lanz-Mendoza<sup>1</sup>

5 <sup>1</sup>Laboratorio de Infección e Inmunidad. Centro de Investigaciones sobre  
6 Enfermedades Infecciosas. Instituto Nacional de Salud Pública, Av. Universidad 655,  
7 CP 62100. Cuernavaca, Morelos, México.

8 Corresponding authors: [humberto@insp.mx](mailto:humberto@insp.mx)

9 **Abstract**

10 Metamorphic insects apparently rely on a finite number of cells after emergence to  
11 counterbalance either commensal and pathogen presence. For hematophagous  
12 insects, blood-feeding is a crucial step for offspring development, therefore enteric  
13 cells repairing molecular mechanisms consists in fine regulated pathways to  
14 counterattack biotic and abiotic insults. Nevertheless, recent research suggests that  
15 midgut cells are capable to adapt their immune responses to pathogen challenges.  
16 Recently, *Anopheles* and *Aedes* mosquitoes have been observed to increase their  
17 DNA cell content upon encounter with parasites, bacteria and virus respectively.  
18 Genomic endoreplication is one of the most important processes in larval  
19 development for fast transcriptional activity and protein secretion.  
20 So, in this paper we explore the ability of *Aedes aegypti* Aag-2 culture cells to  
21 develop a likely endoreplication process to face pathogen presence.  
22 Aag-2 cells at 6 and 12 hours post-biotic insult enter a proliferation arrest and  
23 increases DNA content, these two phenomena recovers control levels at 24 h post-  
24 treatment. It requires more research data about the type of genomic regions that has  
25 been replicated in the process, and the concentration that antimicrobial molecules  
26 are released into culture media.

27

28

29

30

31

32

## 33 **Introduction**

34 Host biological responses against invading pathogens relies on inducible and  
35 constitutive responses, humoral and cellular components, divided into innate and  
36 adaptive responses (Sprent, 1994). Typical innate peripheral cells are NK and  
37 monocyte/macrophages and dendritic cells (Weavers, Evans, Martin, & Wood,  
38 2016); humoral defenses comprise antibody production and complement system,  
39 besides a large families of molecules with antimicrobial properties (Burnet, 1976).  
40 In invertebrates, host responses against invading pathogens relies on limited  
41 resources through innate responses like phagocytosis, nodule formation,  
42 encapsulation, reactive oxygen species local responses and antimicrobial peptides  
43 production (Barnard, Nijhof, Fick, Stutzer, & Maritz-Olivier, 2012; Costa, Jan,  
44 Sarnow, & Schneider, 2009; De Gregorio, Spellman, Tzou, Rubin, & Lemaitre, 2002;  
45 Dong et al., 2006; Hillyer, 2010; Kleino, 2010). These immune responses are  
46 controlled mainly by four transcriptional cascades, Toll, IMD, Jak/STAT and RNAi  
47 (Carissimo et al., 2015; Fragkoudis, Attarzadeh-Yazdi, Nash, Fazakerley, & Kohl,  
48 2009; Lee, Lee, & Lee, 2017; Pasquier, 2005; Schmid-Hempel, 2005; Vilcinskis,  
49 2013; Waldock, Olson, & Christophides, 2012).

50 One of the most promising elements to face invading pathogens is the ability to  
51 unpack DNA to transcribe RNAm and translate a higher protein output to neutralize  
52 invading pathogen population (van Zelm, Szczepański, van der Burg, & van Dongen,  
53 2007). In mammals, adaptive responses relies on immune cells entering clonal  
54 expansion and antibody affinity selection to cope with the proliferating pathogen  
55 population (Bassing, Swat, & Alt, 2002; Sprent, 1994; van Zelm et al., 2007; Weng,  
56 Araki, & Subedi, 2012).

57 In *Drosophila melanogaster* (*Dmel*) the DNA synthesis has been studied in detail  
58 during larval and embryonic stages, where mitotic, incomplete mitotic or  
59 endoreplication cycles fluctuate in egg chamber in fine regulated mechanisms to  
60 developing wings, dorsal polarization and complete egg shell formation (Jia, Tamori,  
61 Pyrowolakis, & Deng, 2014; Perdigoto & Bardin, 2013; Shen & Sun, 2017).

62 Recent research suggests that enteric cells and circulating hemocytes are not only  
63 provided by stem cell differentiation during earlier stages, but presence of adult cell  
64 clusters progenitor post-larval hematopoiesis relies on Delta-Notch signaling in a  
65 similar fashion as in pupal stem cells, and are capable to respond to pathogen  
66 challenges (Ghosh, Singh, Mandal, & Mandal, 2015; Guo & Ohlstein, 2015).

67 In other dipterid, such as *Aedes aegypti*, the midgut adult cells are supposed to not  
68 enter mitosis, hence the adaptive-like response observed to recurrent pathogen  
69 challenge would imply a genomic change in the challenged cells that would allow the  
70 production of effector molecules at a faster pace than the one developed during an  
71 only first encounter. We have previously demonstrated that, upon viral challenge and  
72 inactive virus oral fed, the mosquito *Aedes aegypti* midgut and carcass cells entered  
73 an endoreplication cycle (Serrato-Salas, Hernández-martínez, et al., 2018; Serrato-  
74 Salas, Izquierdo-Sánchez, et al., 2018).

75 This process is controlled by *hnt* gene through Delta-Notch signaling cascade,  
76 triggering the genomic DNA synthesis without entering in a mitotic process. The  
77 process limits the viral spread to the neighboring cells and is probably related to the  
78 progressive diminution of the viral load in the intestinal and somatic cell after the  
79 initial infection (Salazar, Richardson, Sánchez-Vargas, Olson, & Beaty, 2007).

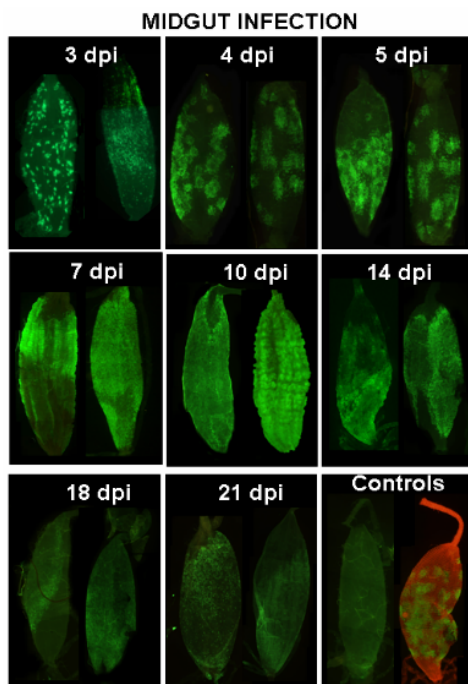

80  
81 Here we studied the effect of a pathogenic challenge on *Aedes aegypti* culture cells  
82 proliferation and immune response.

83  
84  
85  
86

## 87 **Materials and methods**

### 88 Aag-2 cell culture and fungal challenge

89 *Aedes aegypti* Aag-2 cells (ATCC CCL-125) were cultured at 28°C in Schneider's  
90 *Drosophila* medium for maintenance and microbial challenge. The cell media were  
91 supplemented with 10% heat-inactivated fetal bovine serum, 2 mM L-glutamine, and  
92 100 U/mL each of penicillin, streptomycin and neomycin. The monolayer Aag-2 cells  
93 were maintained by re-seeding two-three times per week. The cells plates  
94 confluence used for assays was minimal 80%. Zymosan-PBS solution was added  
95 into the cultured cell medium for 1 h in 24 wells plates.

96 A proliferation assay was performed for Aag-2 cells treated with different zymosan  
97 concentrations at 24 h. The 50% maximum cytotoxic concentration was determined,  
98 to test the effects in cells were not caused by direct reduced proliferation.

99 After incubation, zymosan was removed and replaced with fresh Schneider's media.

100 The stimulated cells were collected through Trypsin-Versene (Thermo Scientific)  
101 partial digestion.

### 102 Cells viability assay

103 Cell viability was determined by trypan blue dye exclusion (0.4% in PBS pH 7.5) in a  
104 Neubauer chamber using a bright field microscope. Three-hundred cells were  
105 counted for each treatment from five independent experiments done by duplicate.  
106 MTT [4,5 dimethylthiazolil-2]-2,5-diphenyl tetrazolium bromide reduction assays were  
107 performed in 96 wells plates. After stimulus, media was removed and replaced with  
108 fresh media plus MTT stock solution. After 3 h incubation at 28°C, cells reduced MTT  
109 to a formazan insoluble product. Supernatants were transferred to an ELISA plate  
110 and solubilized in SDS 10%-HCl 0.01 N solution mix. Optical density was recorded at  
111 a 595nm wavelength. At least, five biological assays were performed. Previously, a  
112 standard curve calibration was performed to correlate optical density to number of  
113 cells.

### 114 cDNA synthesis and qPCR strategy

115 Total RNA from collected Aag-2 cells were performed following protocol instructions  
116 from Trizol Reagent (Sigma-Aldrich). Complementary DNA (cDNA) was synthesized  
117 for qPCR detection. Quantitative PCR were performed in a ViiA 7 Real-Time PCR  
118 System (Applied Biosystems) with the QuantStudio Real Time Software v1.3.  
119 Reactions were realized in a total volume of 10µL containing 5µL of SYBR Green

120 PCR Master mix, 1.5 ng of cDNA template, 250 nmol of each one of primers, and  
121 volume completed with nuclease-free water. Reaction conditions were the following:  
122 50°C for 2 min, 95°C for 10 min followed by 40 cycles of denaturation at 95°C for 15  
123 s, annealing and extension at 60°C for 1 min. The Ct values obtained from the tested  
124 gene relative to the reference gene, was used to obtain delta Ct values of zymosan  
125 treated and control cell samples. S7 gene (ribosomal unit S70) was selected as the  
126 reference gene (Moreno-García, Vargas, Ramírez-Bello, Hernández-Martínez, &  
127 Lanz-Mendoza, 2015; Vargas, Moreno-García, Duarte-Elguea, & Lanz-Mendoza,  
128 2016). Relative expression values were obtained using the delta-delta cycle  
129 threshold (DDCT) method (Bubner, Gase, & Baldwin, 2004).  
130 We used the PCR primers described in our previous work to quantify the  
131 transcription of *hnt* gene upon microbial molecule challenge (Serrato-Salas,  
132 Hernández-martínez, et al., 2018; Serrato-Salas, Izquierdo-Sánchez, et al., 2018).  
133 Briefly, Ribosomal protein S7 (AAEL009496) 292 bp amplicon; forward 5' GGG ACA  
134 AAT CGG CCA GGC TAT C 3', reverse 5' TCG TGG ACG CTT CTG CTT GTT G 3'  
135 primers were used for internal control PCR (Xi, Ramirez, & Dimopoulos, 2008). From  
136 CDS and mRNA predicted sequences, following primers were designed: *hnt* (Fwd):  
137 5' CGC AAG GAG TTA GAG CGT GA 3', *hnt* (Rev): 5' GTG TCG ATC GCA GTT  
138 GGA CT 3'.  
139

| Primer          | Sequence 5' - 3'                    | Amplicon size (bp) | Annealing temperature (°C) |
|-----------------|-------------------------------------|--------------------|----------------------------|
| Hindsight (Fwd) | 5' GTC CAG TTC TCT ACG GCG C 3'     | 106                | 58.1                       |
| Hindsight (Rev) | 5' GTG TCG ATC GCA GTT GGA CT 3'    |                    | 57.4                       |
| S7 (Fwd)        | 5' GGG ACA AAT CGG CCA GGC TAT C 3' | 292                | 60.2                       |
| S7 (Rev)        | 5' TCG TGG ACG CTT CTG CTT GTT G 3' |                    | 60.1                       |

140

#### 141 Genomic DNA extraction

142 Total genomic DNA (gDNA) was extracted with Phenol-Chloroform-Isoamyl Alcohol  
143 mixture according to manufacturer's instructions. Briefly, the culture cells pools  
144 placed in the solvent mixture were homogenized using a small piston until

145 macerated. The phenol interface was washed with citrate buffer. The experimental  
146 gDNAs were precipitated with ethanol as per protocol (Hernandez-Martinez et al.,  
147 2006; Hernández-Martínez, Barradas-Bautista, & Rodríguez, 2013).

#### 148 gDNA fragmentation

149 The extracted gDNA was subsequently sonicated in a X sonicator, through five 30  
150 seconds cycles (on/off) at low power at 4°C. The gDNA fragmentation was asserted  
151 in a 1% agarose gel run in TBE Buffer (Supplementary Material S1).

#### 152 gDNA melting curve

153 The fragmented gDNA melting curves were performed on a Real Time PCR CFX96  
154 from Bio-Rad. 5µL of gDNA were mixed with 1µL of Taq buffer and 4µL of SYBR  
155 Green PCR Master mix. The mix was subjected to a high-resolution melting analysis  
156 from 65°C to 95°C at 0.3°C per second.

#### 157 Agarose pulsed-field electrophoresis

158 Intact cells were embedded in low melting agarose blocks (Schwartz & Cantor 1984).  
159 Cells are lysed and proteins are removed by Proteinase K treatment. This procedure  
160 yields intact DNA. The agarose block can be loaded directly into the well of a pulsed-  
161 field gel. Gels were cast using 1% SeaKem GTG agarose and the electrophoresis  
162 performed 24 hours at 120V in 0.5 x TBE buffer. After the completion of the run the  
163 agarose gel was stained for 15 min in ethidium bromide (1 mg/ml H<sub>2</sub>O). The gel was  
164 destained by two washes in 0.5xTBE for 1 hr with gentle agitation and photographed  
165 using a shortwave UV-light (254 nm). When the DNA was intended to be used for  
166 subsequent restriction and cloning, longwave UV-light (360 nm) was used to avoid  
167 nicking of the DNA.

## 168 **Results**

#### 169 Dose-cytotoxic effect for zymosan-treated cells

170 A proliferation assay for Aag-2 cells treated with different zymosan concentrations for  
171 24 h. The half maximum cytotoxic concentration (CC<sub>50</sub>) value was 34.07-36.91 g/L.  
172 (Figure 1A). The final zymosan concentration was 0.5 g/L (70 times lower),  
173 confirming that cell effects were not caused by reduced proliferation.

#### 174 Zymosan treatment detains the Aag-2 cells proliferation

175 In order to assess the impact of the signaling mediated by fungal cell wall lysate, we  
176 treated Aag-2 cells with zymosan. We counted the cells post challenge and their  
177 viability were assessed. The difference in the number of cells counted post treatment  
178 points to a stoppage of cells duplication (Figure 1B). These cells were viable, and the

179 differences of cell number remained equal when counting with MTT assay, hence  
180 discarding that the effect would be due to cell death (Figure 1C). Both tests showed  
181 that the cell proliferation was detained by the zymosan challenge and that 24 hours  
182 after, this difference was bridged. It seems that immune stress does affect cells  
183 duplication rate.

#### 184 Zymosan-mediated cell growth arrest changes the genomic DNA's cell content

185 As described in Material and Methods, genomic DNA was obtained through organic  
186 solvent extraction (Phenol-Chloroform-Isoamyl alcohol mixture). The total gDNA  
187 amount was measured spectrophotometrically (wavelength 260/280 nm) and  
188 visualized in agarose gel electrophoresis through EtBr staining. Interestingly, though  
189 the number of viable cells was diminished upon zymosan treatment, the total DNA  
190 amount per plate increased. The amount of DNA per cell increased, the most  
191 prominent difference happening 6 h post challenge, remained at 12 h and recovers  
192 control levels at 24 h (Figure 2A). The highest gDNA relative ratio content per cell  
193 was observed 6 hours post treatment (Figure 2B).

#### 194 Zymosan challenge induces *Hnt* gene transcription

195 Endoreplication phenomena in the *Aedes aegypti* mosquito has been previously  
196 observed by our group (Hernandez-Martinez et al., 2006; Hernández-Martínez et al.,  
197 2013; Serrato-Salas, Hernández-martínez, et al., 2018; Serrato-Salas, Izquierdo-  
198 Sánchez, et al., 2018). We determined that the *hnt* gene transcription correlated with  
199 DNA base incorporation in the mosquito cells nuclei (Hernandez-Martinez et al.,  
200 2006; Serrato-Salas, Hernández-martínez, et al., 2018). Therefore, we analyzed the  
201 *hnt* gene transcription upon microbial challenge. We found that six hours after the  
202 zymosan challenge, *hnt* transcript nearly triplicated (Figure 3). Interestingly, the  
203 zymosan challenge elicited *hnt* transcription in a timely fashion as to be related with  
204 the gDNA/cell increase observed earlier.

#### 205 Zymosan stimulation altered gDNA sequence proportions

206 Cell genomic DNA entered an endoreplicating cycle with specific sequences  
207 amplified. The melting curve of the extracted gDNA showed diverging pattern in  
208 control and zymosan challenged Aag-2 culture cells. If the phenomenon would have  
209 implied a gDNA duplication, the proportion of each genomic sequences would have  
210 been equal hence their melting curves also. As can be observed in Figure 4, The  
211 melting curve of the sonicated gDNA of control and induced cells are different. The  
212 fact that some lower temperature peaks are bigger in zymosan treated cells point to

213 an increase in the number of specific sequences against the rest of the genome,  
214 suggesting that only specific part of the genome are amplified. The melt temperature  
215 of the control samples was 75.06 +- 2.1 °c while the zymosan treated gDNA had a  
216 melt temperature of 66.52+-3.2 °c. This could be due to the relative amount of  
217 repeated sequences of the endoreplicated sequences that would separate jointly at a  
218 lower temperature than the non endoreplicated gDNA part.

#### 219 Zymosan stimulated *Aag2* cells gDNA present lower molecular weight DNA

220 The later evidences pointed to the amplification of specific gDNA regions by the  
221 *Aag2* cells submitted to the zymosan stress. The partial gDNA amplification implied  
222 the presence of large extrachromosomal DNA sequences in the treated cells  
223 nucleus. Therefore, we separate the chromosomal DNA by pulse field  
224 chromatography, expecting to see large DNA fragment in the gDNA of the treated  
225 cells. As can be seen in figure 5, we did observe such fragment in the treated cell  
226 gDNA between 25 and 35 kBases.

227

#### 228 **Conclusion**

229 *Aag-2* cells is a model for *Aedes aegypti* competent immune response. Immune  
230 challenge induces cell division arrest in these cells. The relative genomic DNA  
231 content transiently increases at the same time that *hnt* gene transcription increases.  
232 The DNA content increase is related to specific genomic sequence amplification, the  
233 same are transient and resolved 24 hours post immune stress.

234

235

236



237

238 Figure 1

239 A

240

241

242

243

244

245

246

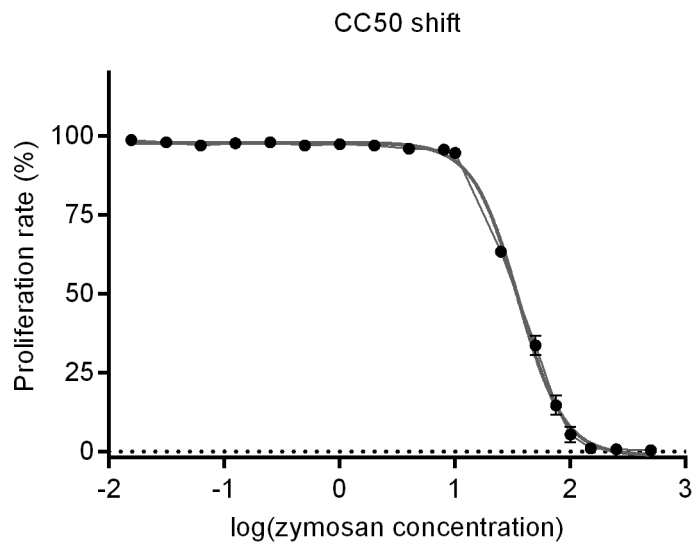

247 B

248

249

250

251

252

253

254

255

256

257

258

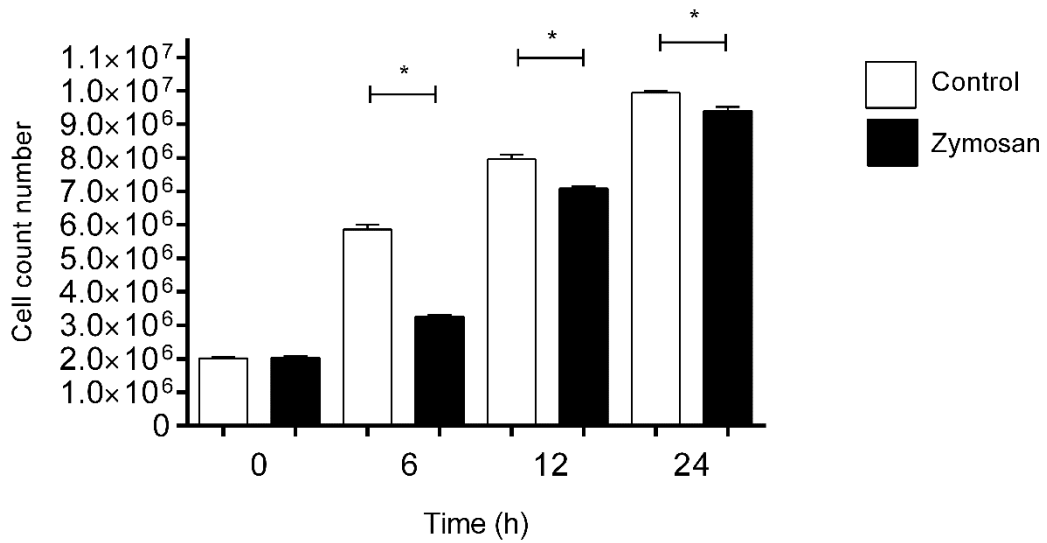

259 C

260

261

262

263

264

265

266

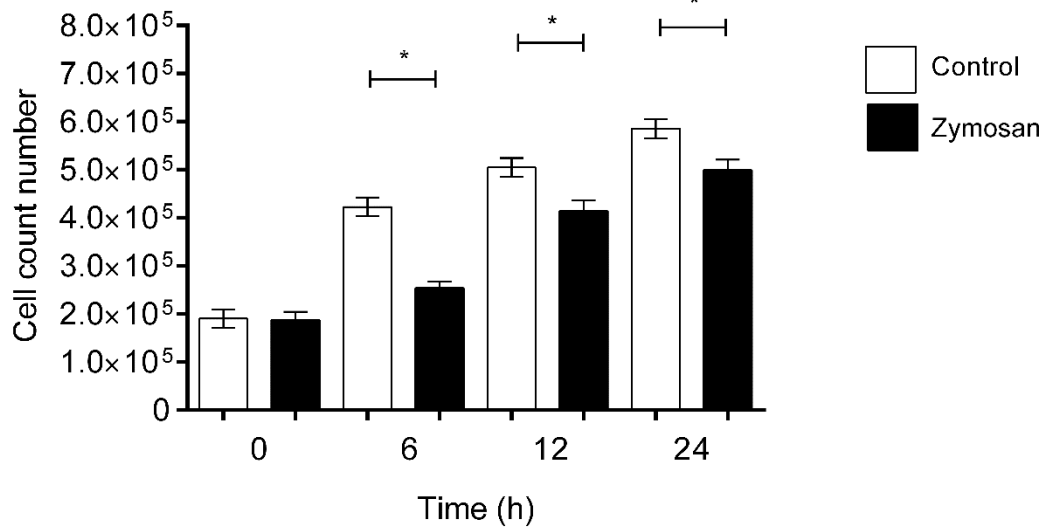

267 Fig. 1: A) Cytotoxic concentration assay. LogCC50 1.532-1.567 (CC50 34.07-36.91

268 g/L).  $R^2 = 0.9977$ . B) Aag-2 cells number per culture plate over 24 hours post

269 zymosan challenge. Student's T-test with Welch's correction 0 h  $p=0.7148$ . 6 h

270  $p<0.0001$ . 12 h  $p<0.0001$ . 24 h  $p<0.0001$ . C) MTT exclusion dye viable cell number

271 per culture plate over 24 hours post zymosan challenge. Student T-test welch

272 correction values are for 0 h time point  $p=0.6694$ ; 6 h  $p<0.0001$ ; 12 h  $p<0.0001$ , 24 h

273  $p<0.0001$ .

274

275

276 Fig. 2

277 A

278

279

280

281

282

283

284

285

286

287

288

289

290

291

292

293

294

295

296

297

298

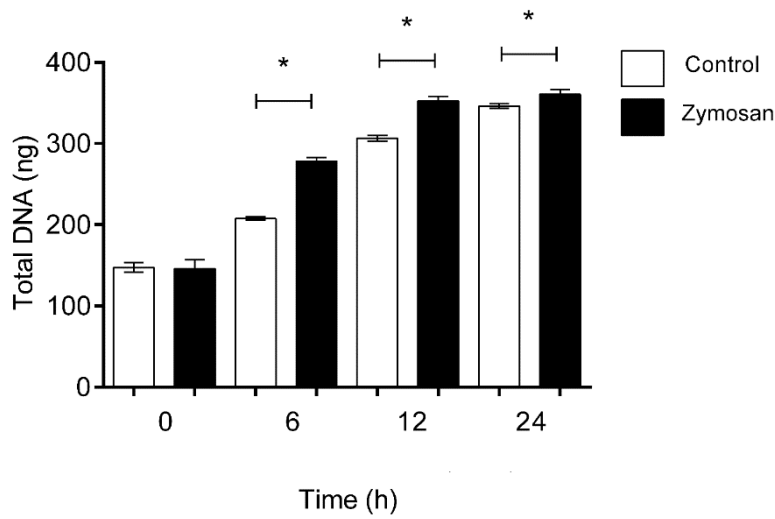

285 B

286

287

288

289

290

291

292

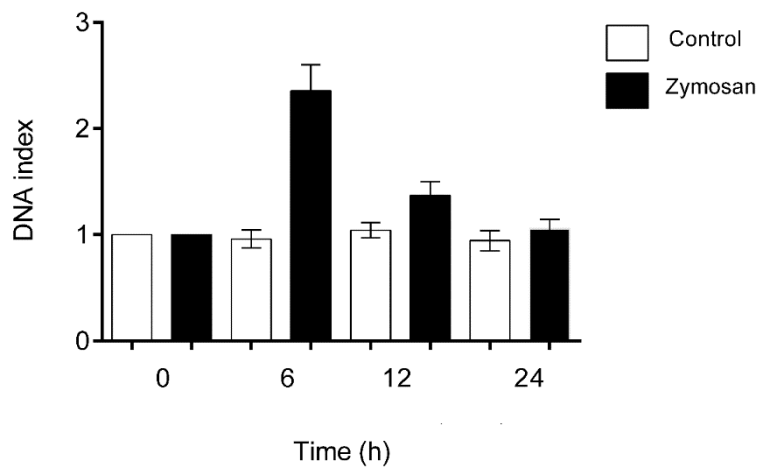

293 Figure 2: A) Total gDNA amount extracted from the cell cultures at 0, 6, 12 and 24

294 hours post zymosan challenge. 0 h  $p=0.6676$ . 6 h  $p<0.0001$ . 12 h  $p<0.0001$ . 24 h

295  $p<0.0001$ .

296 B) Normalized relative gDNA content per cell at 0, 6, 12 and 24 hours post zymosan

297 challenge.

298

299 Fig. 3

300

301

302

303

304

305

306

307

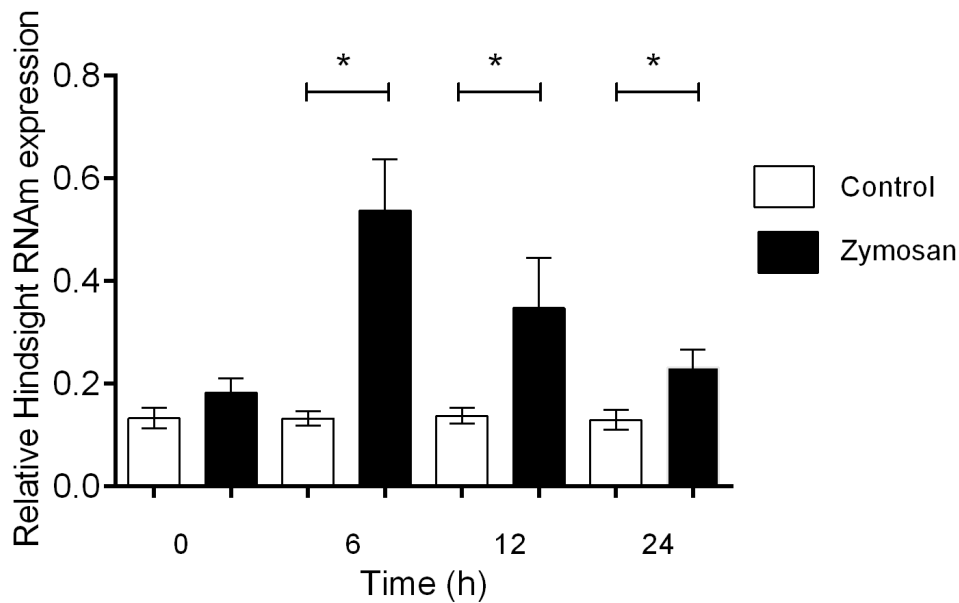

308 Figure 3: Relative *Hindsight* gene transcription post challenge. The transcripts

309 amount values were normalized against ribosomal S7 gen. 0 h  $p=0.0001$ . 6 h

310  $p<0.0001$ . 12 h  $p<0.0001$ . 24 h  $p<0.0001$ .

311

312 Figure 4

313 A

314 Comparison of PCR gDNA amplification of Aag2 6 H post treatment and control

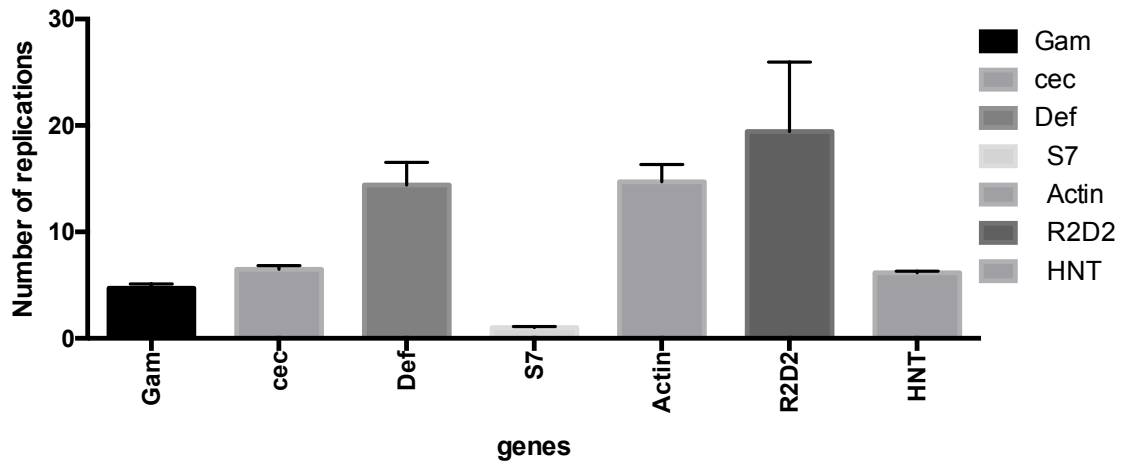

323 B

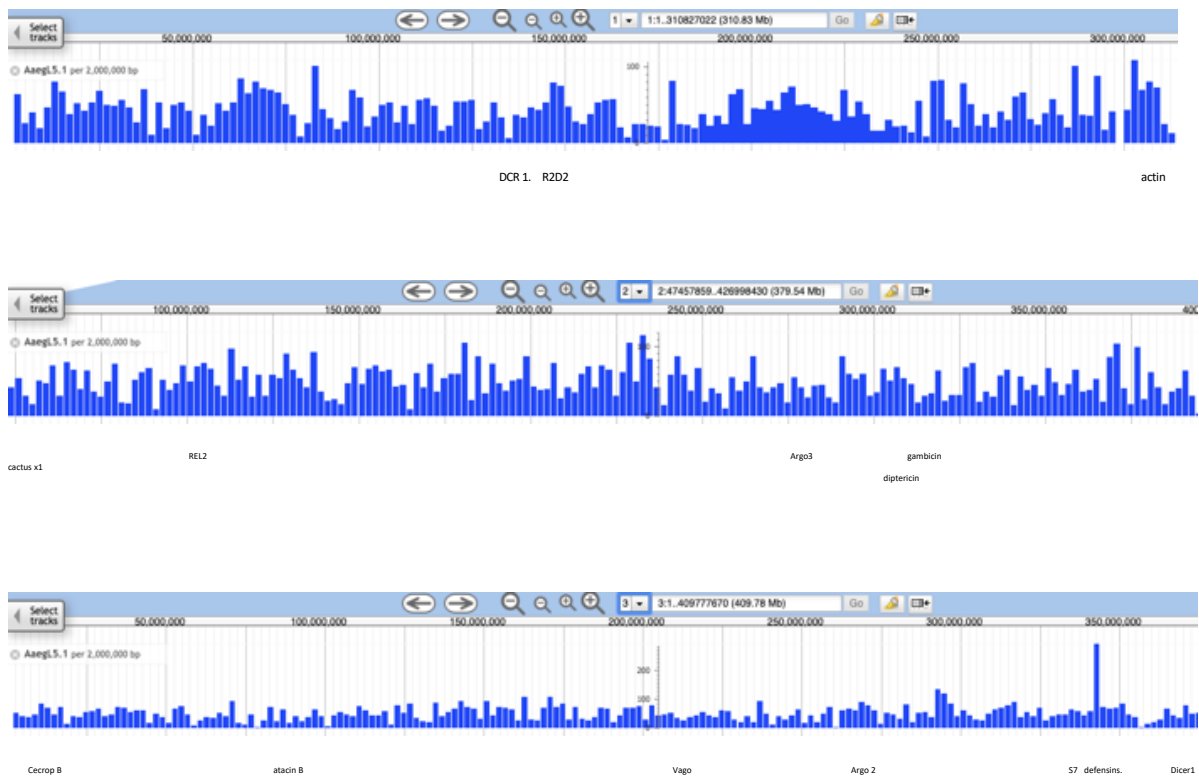

340 Fig.4 A Genomic PCR of distinct *Aedes* genes. The amplification of the same amount of  
341 gDNA was relativized to the gene that needed the most cycle to appear: S7. 4B Genomic  
342 distribution of the genes sequence chosen for gDNA qPCR.

343

344 Fig. 5

345 A)

346

347

348

349

350

351

352

353

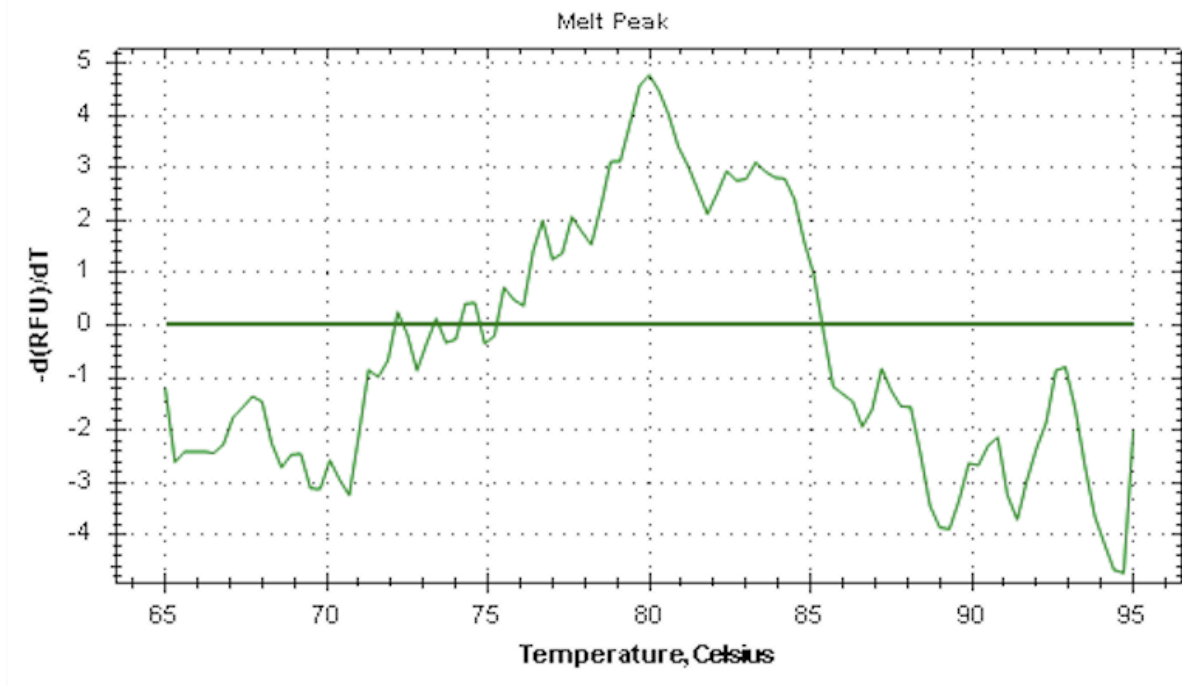

354 B)

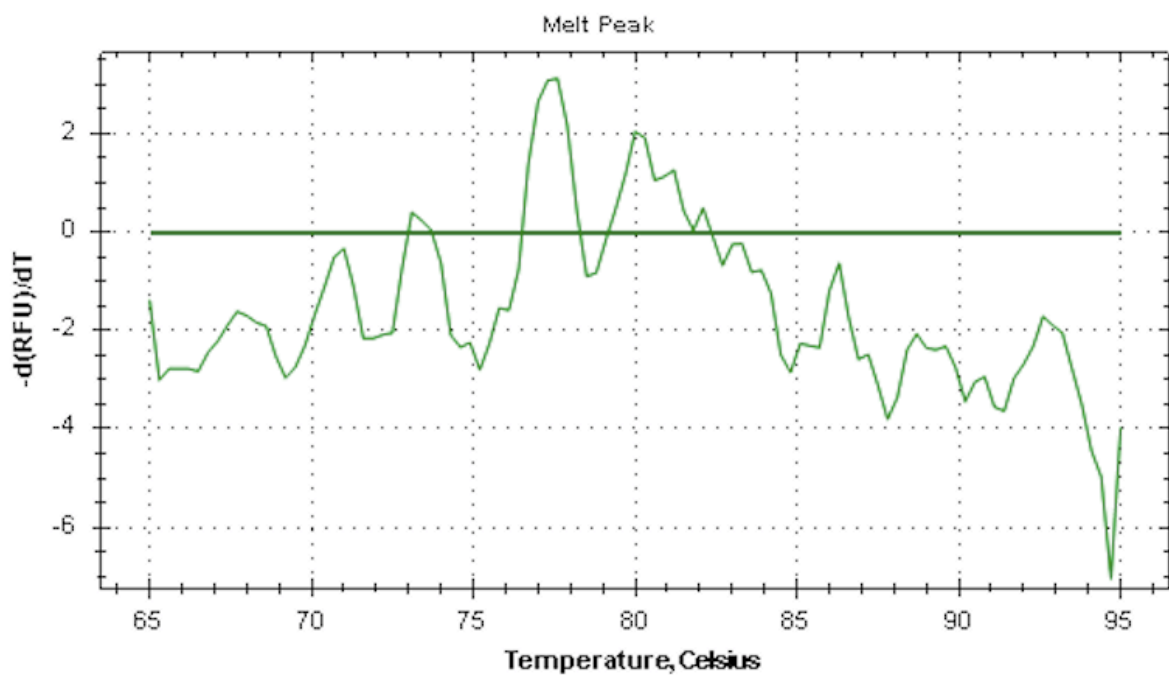

355

356 Figure 4. Melt peaks of sonicated cultured cells gDNA A) in control conditions B) six

357 hours post Zymosan exposure.

358

359  
360  
361  
362  
363  
364  
365

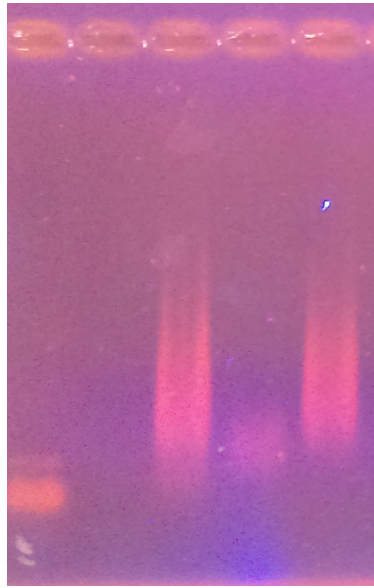

366 Figure S1: Aag-2 cells gDNA fragmentation.  
367

368  
369  
370  
371  
372  
373  
374  
375

376 Fig. 5

377 MWM. A. B

378 Size in kB

379

380

381

388

339

382

291

383

242

384

194

385

145.5

386

387

97

388

389

48.5

390

391

392

393

394 Figure 5: Pulsed field gel of the *Aag2* cells gDNA Control (A) and 6 hours post Zymozaan

395 challenge (B).

396

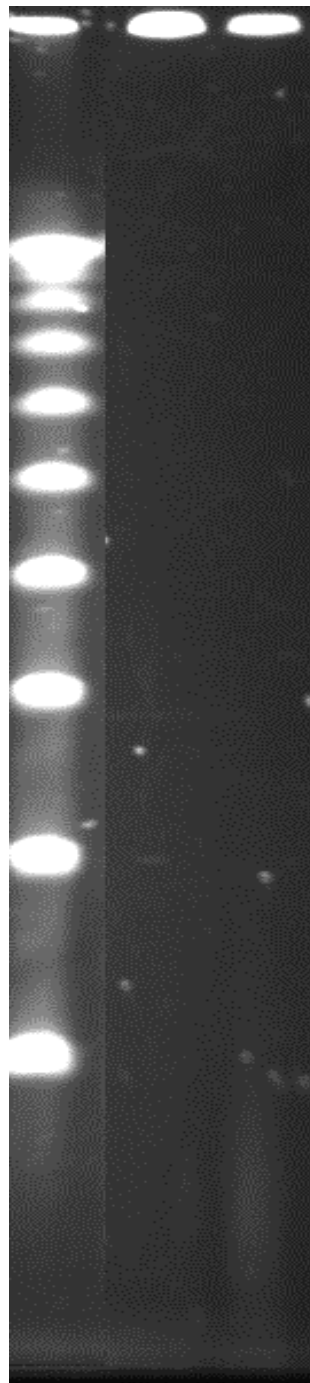



397 Fig.6

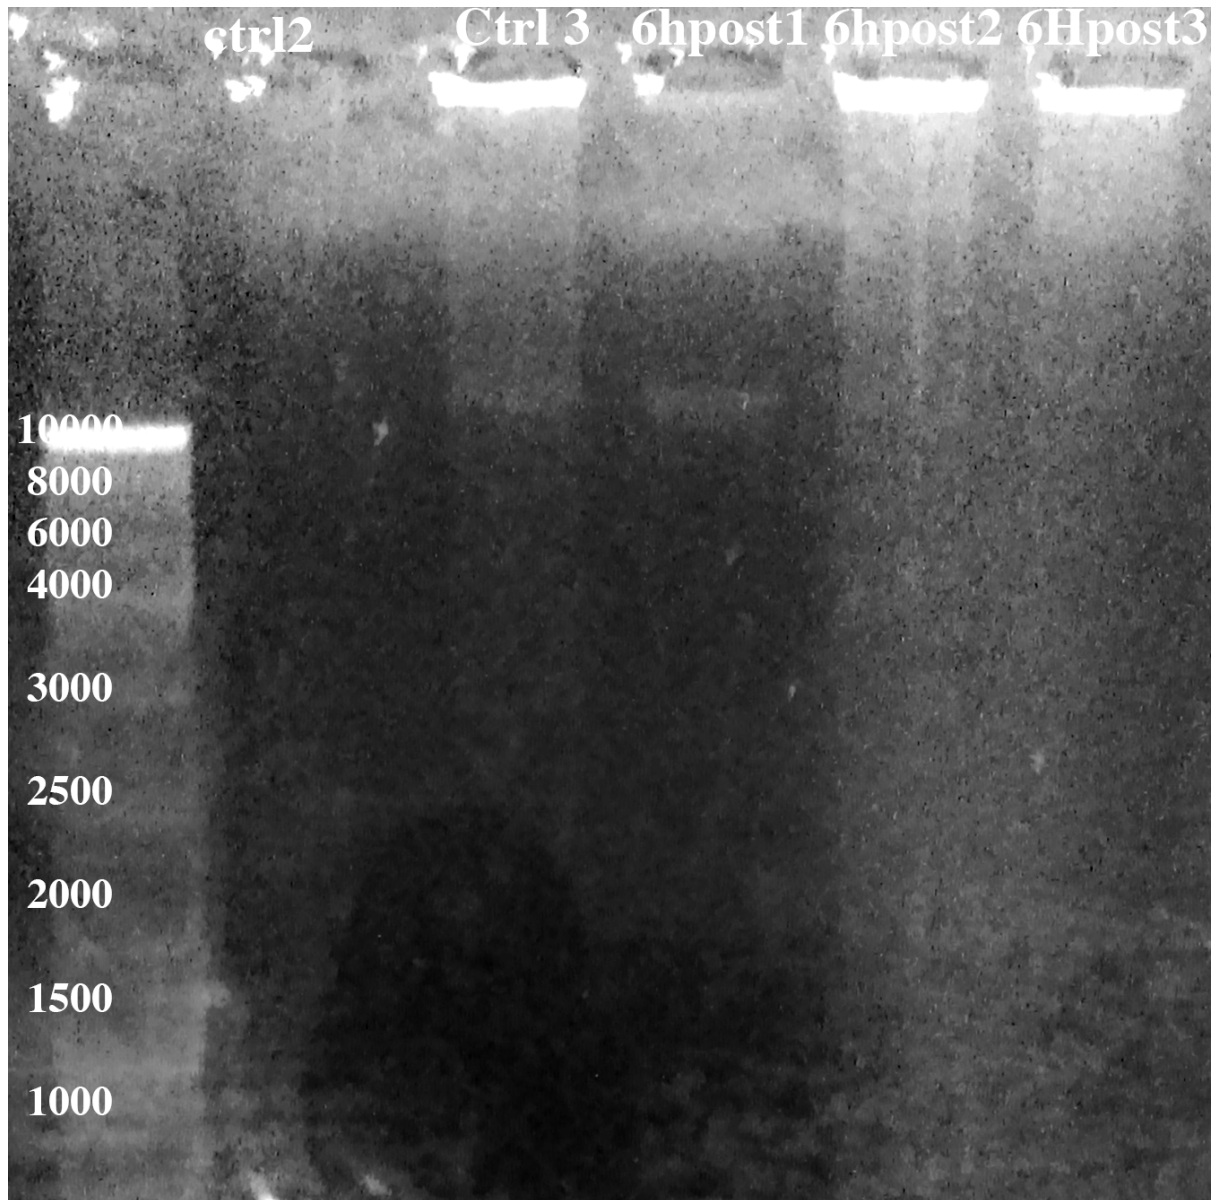

398

399 Fig. 6: gDNA of control and zymosan treated cells.

400

401 Fig. S.2

402

403 A)

404

405

406

407

408

409

410

411

412

413

414

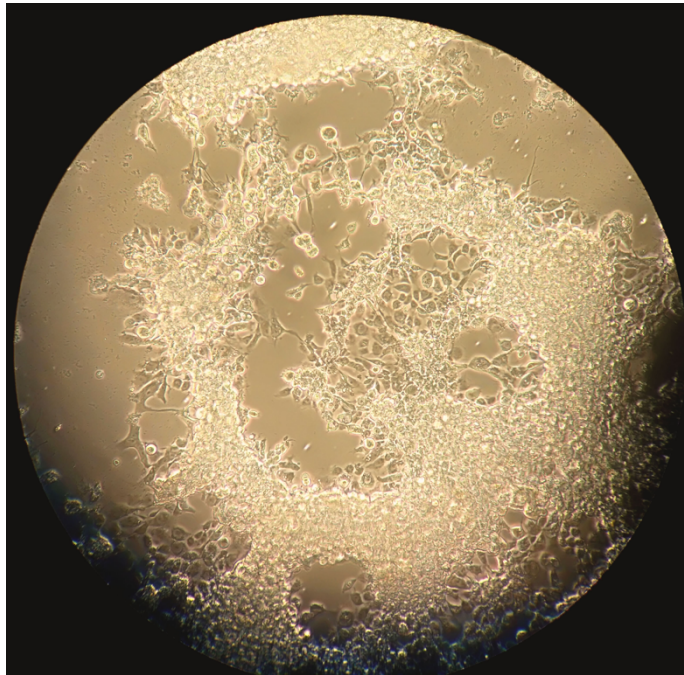

415 B)

416

417

418

419

420

421

422

423

424

425

426

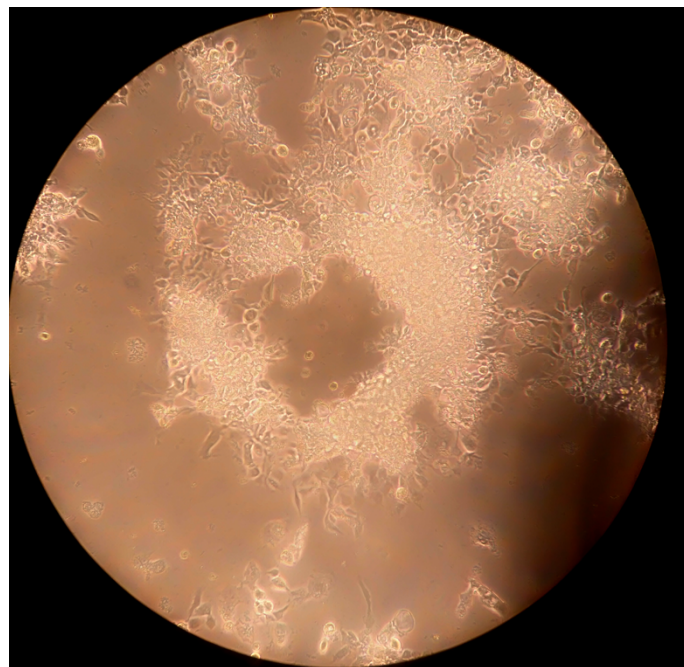

427 S2: Aag2 culture cells 20X pictures. A) control, B) six hours post zymosan treatment.

## 428 References

- 429 Barnard, A. C., Nijhof, A. M., Fick, W., Stutzer, C., & Maritz-Olivier, C. (2012). RNAi in  
430 arthropods: Insight into the machinery and applications for understanding the pathogen-  
431 vector interface. *Genes*, 3(4), 702–741. <https://doi.org/10.3390/genes3040702>
- 432 Bassing, C. H., Swat, W., & Alt, F. W. (2002). The mechanism and regulation of  
433 chromosomal V(D)J recombination. *Cell*, 109 Suppl(D), S45-55.
- 434 Bubner, B., Gase, K., & Baldwin, I. T. (2004). Two-fold differences are the detection limit  
435 for determining transgene copy numbers in plants by real-time PCR. *BMC*  
436 *Biotechnology*, 4, 14. <https://doi.org/10.1186/1472-6750-4-14> 1472-6750-4-14 [pii]
- 437 Burnet, F. M. (1976). A Modification of Jerne's Theory of Antibody Production using the  
438 Concept of Clonal Selection. *CA: A Cancer Journal for Clinicians*, 26(2), 119–121.  
439 <https://doi.org/10.3322/canjclin.26.2.119>
- 440 Carissimo, G., Pondeville, E., McFarlane, M., Dietrich, I., Mitri, C., Bischoff, E., ... Vernick,  
441 K. D. (2015). Antiviral immunity of *Anopheles gambiae* is highly compartmentalized,  
442 with distinct roles for RNA interference and gut microbiota. *Proceedings of the National*  
443 *Academy of Sciences*, 112(2), E176–E185. <https://doi.org/10.1073/pnas.1412984112>
- 444 Costa, A., Jan, E., Sarnow, P., & Schneider, D. (2009). The Imd pathway is involved in  
445 antiviral immune responses in *Drosophila*. *PLoS ONE*, 4(10).  
446 <https://doi.org/10.1371/journal.pone.0007436>
- 447 De Gregorio, E., Spellman, P. T., Tzou, P., Rubin, G. M., & Lemaitre, B. (2002). The Toll  
448 and Imd pathways are the major regulators of the immune response in *Drosophila*.  
449 *EMBO Journal*, 21(11), 2568–2579. <https://doi.org/10.1093/emboj/21.11.2568>
- 450 Dong, Y., Aguilar, R., Xi, Z., Warr, E., Mongin, E., & Dimopoulos, G. (2006). *Anopheles*  
451 *gambiae* immune responses to human and rodent Plasmodium parasite species. *PLoS*  
452 *Pathogens*, 2(6), 0513–0525. <https://doi.org/10.1371/journal.ppat.0020052>
- 453 Fragkoudis, R., Attarzadeh-Yazdi, G., Nash, A. A., Fazakerley, J. K., & Kohl, A. (2009).  
454 Advances in dissecting mosquito innate immune responses to arbovirus infection.  
455 *Journal of General Virology*, 90(9), 2061–2072. <https://doi.org/10.1099/vir.0.013201-0>
- 456 Ghosh, S., Singh, A., Mandal, S., & Mandal, L. (2015). Active Hematopoietic Hubs in  
457 *Drosophila* Adults Generate Hemocytes and Contribute to Immune Response.  
458 *Developmental Cell*, 33(4), 478–488. <https://doi.org/10.1016/j.devcel.2015.03.014>
- 459 Guo, Z., & Ohlstein, B. (2015). Bidirectional Notch signaling regulates *Drosophila* intestinal  
460 stem cell multipotency. *Science*, 350(6263), 927.  
461 <https://doi.org/10.1126/science.aab0988>
- 462 Hernández-Martínez, S., Barradas-Bautista, D., & Rodríguez, M. H. (2013). Differential DNA  
463 Synthesis In *Anopheles albimanus* Tissues Induced By Immune Challenge With  
464 Different Microorganisms. *Archives of Insect Biochemistry and Physiology*, 84(1), 1–14.  
465 <https://doi.org/10.1002/arch.21108>
- 466 Hernandez-Martinez, S., Román-Martínez, U., Martínez-Barnetche, J., Garrido, E.,  
467 Rodríguez, M. H., & Lanz-Mendoza, H. (2006). Induction of DNA synthesis in  
468 *Anopheles albimanus* tissue cultures in response to a *Saccharomyces cerevisiae*  
469 challenge. *Archives of Insect Biochemistry and Physiology*, 63(4), 147–158.  
470 <https://doi.org/10.1002/arch.20150>
- 471 Hillyer, J. F. (2010). MOSQUITO IMMUNITY (pp. 218–238).

- 472 Jia, D., Tamori, Y., Pyrowolakis, G., & Deng, W. M. (2014). Regulation of broad by the  
473 Notch pathway affects timing of follicle cell development. *Developmental Biology*,  
474 392(1), 52–61. <https://doi.org/10.1016/j.ydbio.2014.04.024>
- 475 Kleino, A. (2010). *The Imd Pathway-mediated Immune Response in Drosophila*.
- 476 Lee, J. H., Lee, K. A., & Lee, W. J. (2017). *Microbiota, Gut Physiology, and Insect*  
477 *Immunity. Advances in Insect Physiology* (1st ed., Vol. 52). Elsevier Ltd.  
478 <https://doi.org/10.1016/bs.aiip.2016.11.001>
- 479 Moreno-García, M., Vargas, V., Ramírez-Bello, I., Hernández-Martínez, G., & Lanz-  
480 Mendoza, H. (2015). Bacterial Exposure at the Larval Stage Induced Sexual Immune  
481 Dimorphism and Priming in Adult *Aedes aegypti* Mosquitoes. *PloS One*, 10(7),  
482 e0133240. <https://doi.org/10.1371/journal.pone.0133240>
- 483 Pasquier, L. Du. (2005). Insects Diversify One Molecule to Serve Two Systems,  
484 (September), 1826–1827.
- 485 Perdigoto, C. N., & Bardin, A. J. (2013). Sending the right signal: Notch and stem cells.  
486 *Biochimica et Biophysica Acta - General Subjects*, 1830(2), 2307–2322.  
487 <https://doi.org/10.1016/j.bbagen.2012.08.009>
- 488 Salazar, M. I., Richardson, J. H., Sánchez-Vargas, I., Olson, K. E., & Beaty, B. J. (2007).  
489 Dengue virus type 2: replication and tropisms in orally infected *Aedes aegypti*  
490 mosquitoes. *BMC Microbiology*, 7, 9. <https://doi.org/10.1186/1471-2180-7-9>
- 491 Schmid-Hempel, P. (2005). Evolutionary Ecology of Insect Immune Defenses. *Annual*  
492 *Review of Entomology*, 50(1), 529–551.  
493 <https://doi.org/10.1146/annurev.ento.50.071803.130420>
- 494 Serrato-Salas, J., Hernández-martínez, S., Martínez-barnetche, J., Condé, R., Alvarado-  
495 delgado, A., Zumaya-estrada, F., & Lanz-mendoza, H. (2018). De Novo DNA Synthesis  
496 in *Aedes aegypti* Midgut Cells as a Complementary Strategy to Limit Dengue Viral  
497 Replication, 9(April), 1–12. <https://doi.org/10.3389/fmicb.2018.00801>
- 498 Serrato-Salas, J., Izquierdo-Sánchez, J., Argüello, M., Conde, R., Alvarado-Delgado, A., &  
499 Lanz-Mendoza, H. (2018). *Aedes aegypti* antiviral adaptive response against DENV-2.  
500 *Developmental & Comparative Immunology*, 84, 28–36.  
501 <https://doi.org/10.1016/j.dci.2018.01.022>
- 502 Shen, W., & Sun, J. (2017). Dynamic Notch Signaling Specifies Each Cell Fate in *Drosophila*  
503 Spermathecal Lineage. *G3 (Bethesda, Md.)*, 7(5), 1417–1427.  
504 <https://doi.org/10.1534/g3.117.040212>
- 505 Sprent, J. (1994). T and B memory cells. *Cell*, 76(2), 315–22. [https://doi.org/10.1016/0092-](https://doi.org/10.1016/0092-8674(94)90338-7)  
506 [8674\(94\)90338-7 \[pii\]](https://doi.org/10.1016/0092-8674(94)90338-7)
- 507 van Zelm, M. C., Szczepański, T., van der Burg, M., & van Dongen, J. J. M. (2007).  
508 Replication history of B lymphocytes reveals homeostatic proliferation and extensive  
509 antigen-induced B cell expansion. *The Journal of Experimental Medicine*, 204(3), 645–  
510 655. <https://doi.org/10.1084/jem.20060964>
- 511 Vargas, V., Moreno-García, M., Duarte-Elguea, E., & Lanz-Mendoza, H. (2016). Limited  
512 Specificity in the Injury and Infection Priming against Bacteria in *Aedes aegypti*  
513 Mosquitoes. *Frontiers in Microbiology*, 7, 975.  
514 <https://doi.org/10.3389/fmicb.2016.00975>
- 515 Vilcinskis, A. (2013). Evolutionary plasticity of insect immunity. *Journal of Insect*  
516 *Physiology*, 59(2), 123–9. <https://doi.org/10.1016/j.jinsphys.2012.08.018>

- 517 Waldock, J., Olson, K. E., & Christophides, G. K. (2012). Anopheles gambiae antiviral  
518 immune response to systemic O'nyong-nyong infection. *PLoS Neglected Tropical*  
519 *Diseases*, 6(3). <https://doi.org/10.1371/journal.pntd.0001565>
- 520 Weavers, H., Evans, I. R., Martin, P., & Wood, W. (2016). Corpse Engulfment Generates a  
521 Molecular Memory that Primes the Macrophage Inflammatory Response. *Cell*, 165(7),  
522 1658–1671. <https://doi.org/10.1016/j.cell.2016.04.049>
- 523 Weng, N., Araki, Y., & Subedi, K. (2012). The molecular basis of the memory T cell  
524 response: differential gene expression and its epigenetic regulation. *Nature Reviews*  
525 *Immunology*, 12(4), 306–315. <https://doi.org/10.1038/nri3173>
- 526 Xi, Z., Ramirez, J. L., & Dimopoulos, G. (2008). The Aedes aegypti toll pathway controls  
527 dengue virus infection. *PLoS Pathogens*. <https://doi.org/10.1371/journal.ppat.1000098>
- 528
